# Supplementary material for: Phosphate-sensing with (di-(2-picolyl)amino)quinazolines based on a fluorescence on–off system
Source: Royal Society of Chemistry journal article supplement (doi:10.1039/d0ra01455a), 2020-01-01

## Electronic Supplementary Information

# Phosphate-sensing with (di-(2-picolyl)amino)quinazolines based on fluorescence on-off system

Kazusa Aoki,<sup>a</sup> Ryuji Osako,<sup>a</sup> Jiahui Deng,<sup>a</sup> Takeshi Hashimoto,<sup>a</sup> Takashi Hayashita,<sup>a</sup> and Yumiko Suzuki<sup>a</sup>

<sup>a</sup>*Department of Materials and Life Sciences, Faculty of Science and Technology, Sophia University, Kioi-cho 7-1, Chiyoda-ku, Tokyo 102-8554, Japan.*

### Table of Contents

|                                                                                    |    |
|------------------------------------------------------------------------------------|----|
| Fig. S1: pH profile .....                                                          | 2  |
| Fig. S2: Cu Titration Curve .....                                                  | 4  |
| Fig. S3: Binding Constants of Cu-dpa-QZ1 to Phosphoric Acids .....                 | 5  |
| Fig. S4: Binding Constants of Cu-dpa-QZ2 to Phosphoric Acids .....                 | 6  |
| Fig. S5: Comparison Studies of Blue Shift under Hydrophobic Condition .....        | 7  |
| Fig. S6: Metal Ion Selectivity of dpa-QZ1 in the presence of CyDs.....             | 8  |
| Fig. S7: Metal Ion Selectivity of dpa-QZ2 in the presence of CyDs.....             | 9  |
| Fig. S8: Phosphoric Acids Recognition of Cu-dpa-QZ1 in the presence of CyDs .....  | 10 |
| Fig. S9: Phosphoric Acids Recognition of Cu-dpa-QZ2 in the presence of CyDs .....  | 11 |
| Fig. S10: Phosphoric Acids Recognition of Cu-dpa-QZ2 in the presence of CyDs ..... | 12 |
| Fig. S11: Fluorescence response of dpa-QZ2 to FPB- $\gamma$ -CyD.....              | 13 |
| Calculation of the Binding Constants .....                                         | 14 |
| NMR Spectra .....                                                                  | 16 |

Fig. S1: pH profile

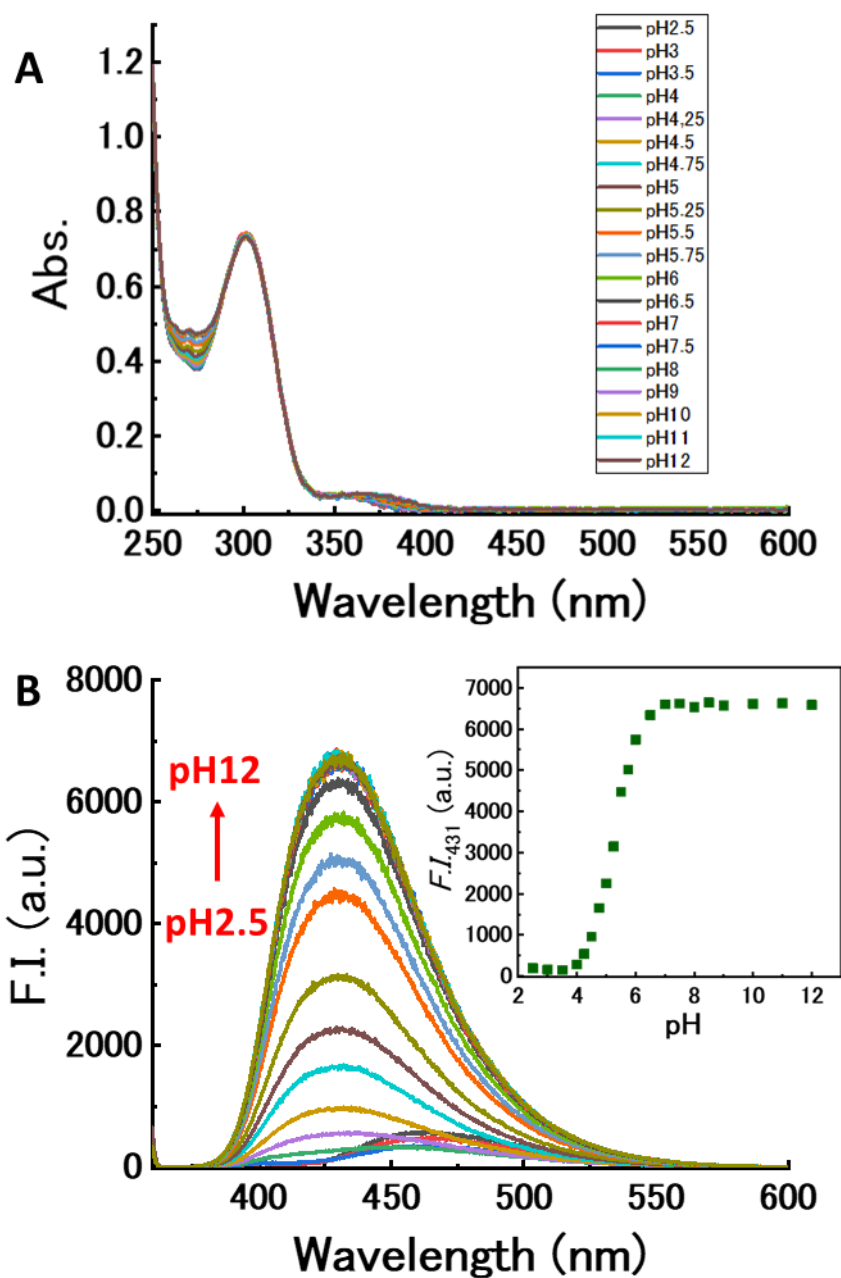

Fig. S1 (A) Absorption and (B) Fluorescence spectra of **dpa-QZ1** with various pH in 1% DMSO-99% water (v/v), adjusted by HEPES/NaOH buffer, at 25 °C ( $\lambda_{\text{ex}} = 355$  nm). [dpa-QZ1] = 10  $\mu\text{M}$ , [HEPES buffer] = 5.0 mM, [NaNO<sub>3</sub>] = 0.10 M

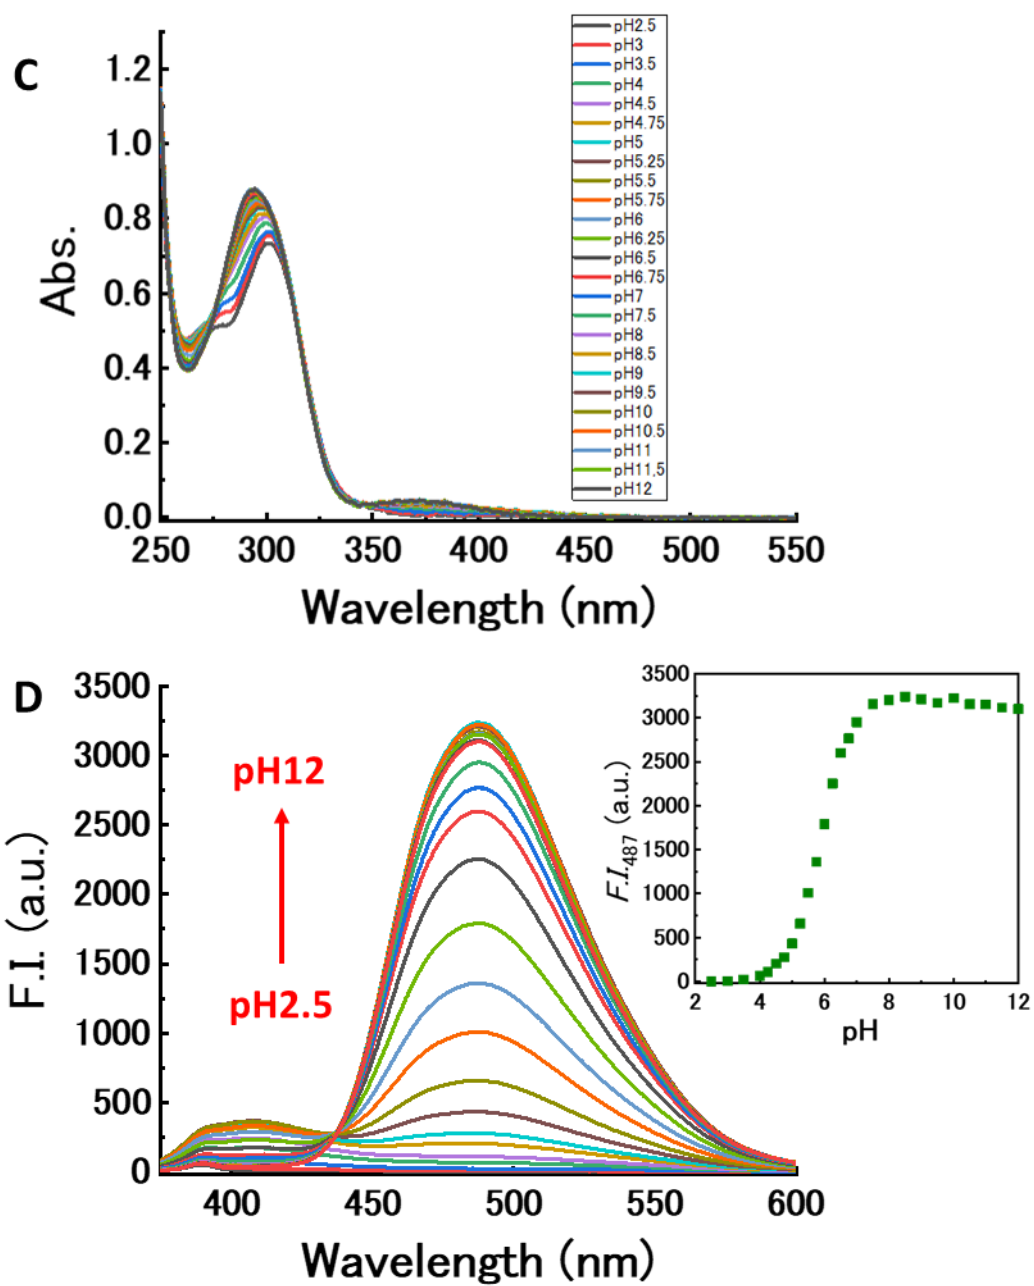

**Fig. S1** (C) Absorption and (D) Fluorescence spectra of **dpa-QZ2** with various pH in 1% DMSO-99% water (v/v), adjusted by HEPES/NaOH buffer, at 25 °C ( $\lambda_{\text{ex}} = 345 \text{ nm}$ ). [dpa-QZ2] = 10  $\mu\text{M}$ , [HEPES buffer] = 5.0 mM, [NaNO<sub>3</sub>] = 0.10 M

Fig. S2: Cu Titration Curve

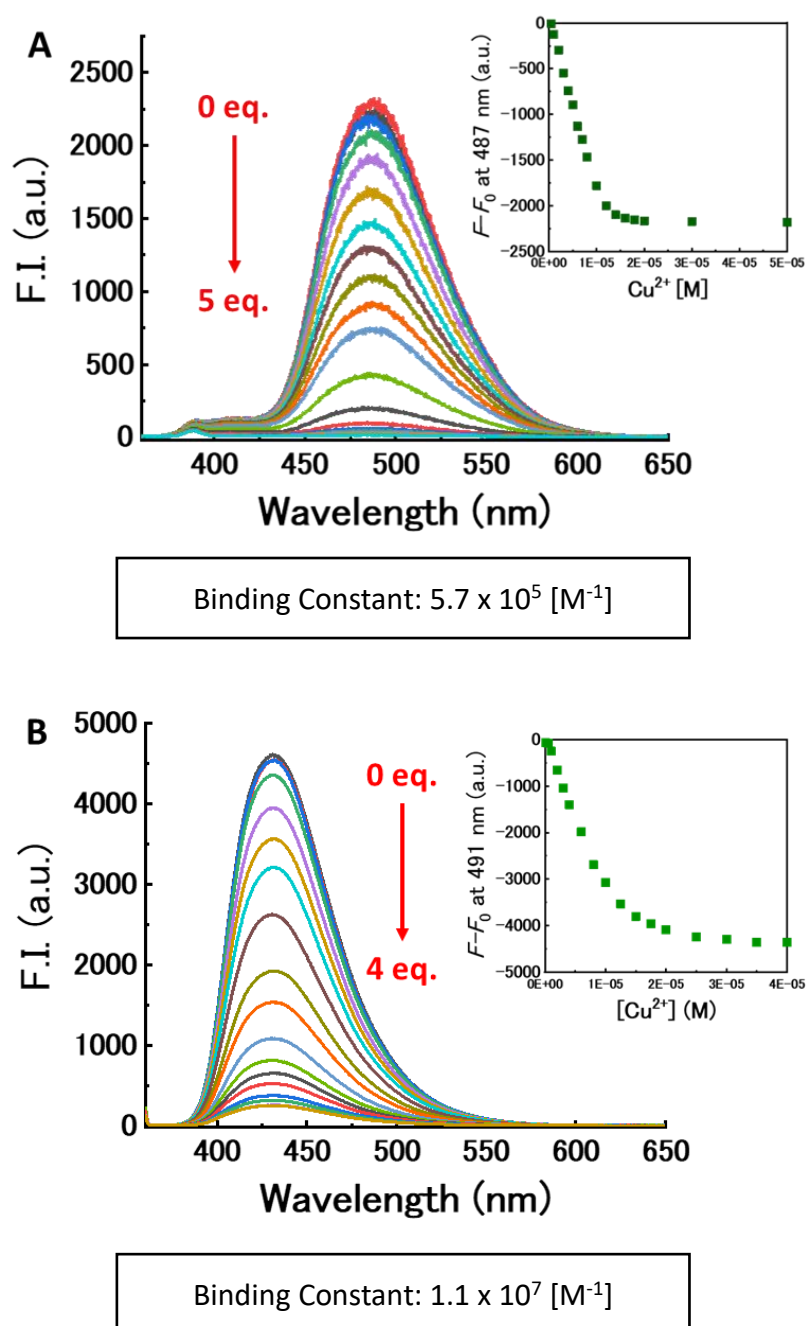

**Fig. S2** Fluorescence spectra and Fluorescence change at fluorescence maximum wavelength of **dpa-QZ1** and **dpa-QZ2** with Cu<sup>2+</sup> in 1% DMSO-99% water (v/v), pH7.4 adjusted by HEPES/NaOH buffer, at 25 °C ( $\lambda_{\text{ex}}^{\text{dpa-QZ1}} = 355 \text{ nm}$ ,  $\lambda_{\text{ex}}^{\text{dpa-QZ2}} = 345 \text{ nm}$ ). [probe] = 10  $\mu\text{M}$ , [Cu(NO<sub>3</sub>)<sub>2</sub>] = 0 – 50  $\mu\text{M}$ , [NaNO<sub>3</sub>] = 0.10 M.

**Fig. S3: Binding Constants of Cu-dpa-QZ1 to Phosphoric Acids**

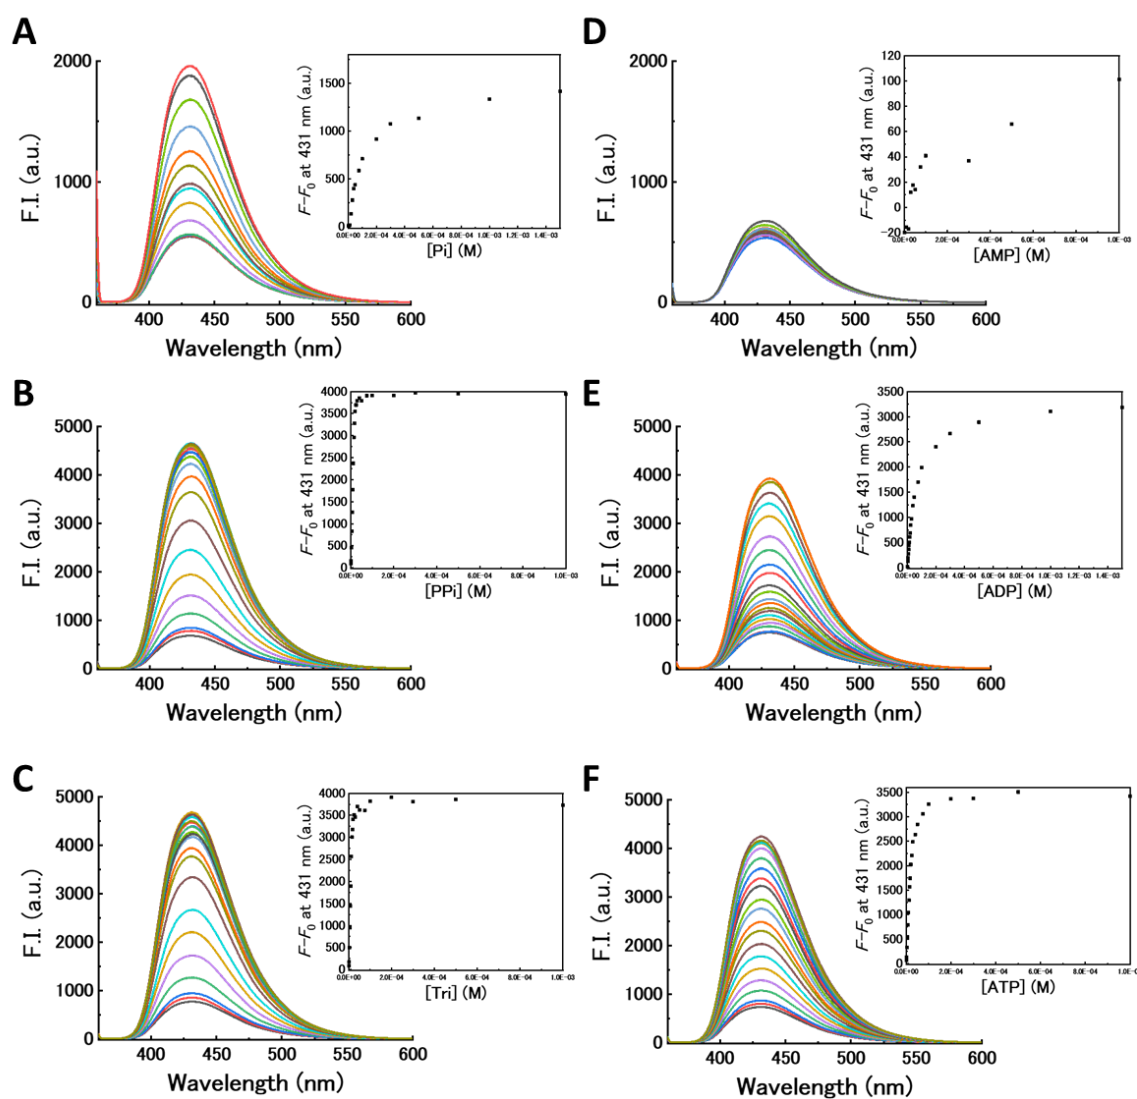

**Fig. S3** Fluorescence spectra and Fluorescence change at 431 nm of **Cu-dpa-QZ1** against (A) Pi, (B) PPI, (C) Tri, (D) AMP, (E) ADP and (F) ATP in 1% DMSO-99% water (v/v), pH7.4 adjusted by HEPES/NaOH buffer, at 25 °C ( $\lambda_{\text{ex}} = 355 \text{ nm}$ ). **[dpa-QZ1]** = 0.01 mM, **[Cu(NO<sub>3</sub>)<sub>2</sub>]** = 0.02 mM, **[phosphoric acid]** = 0 - 4 mM, **[HEPES buffer]** = 5.0 mM, **[NaNO<sub>3</sub>]** = 0.10 M.

**Fig. S4: Binding Constants of Cu-dpa-QZ2 to Phosphoric Acids**

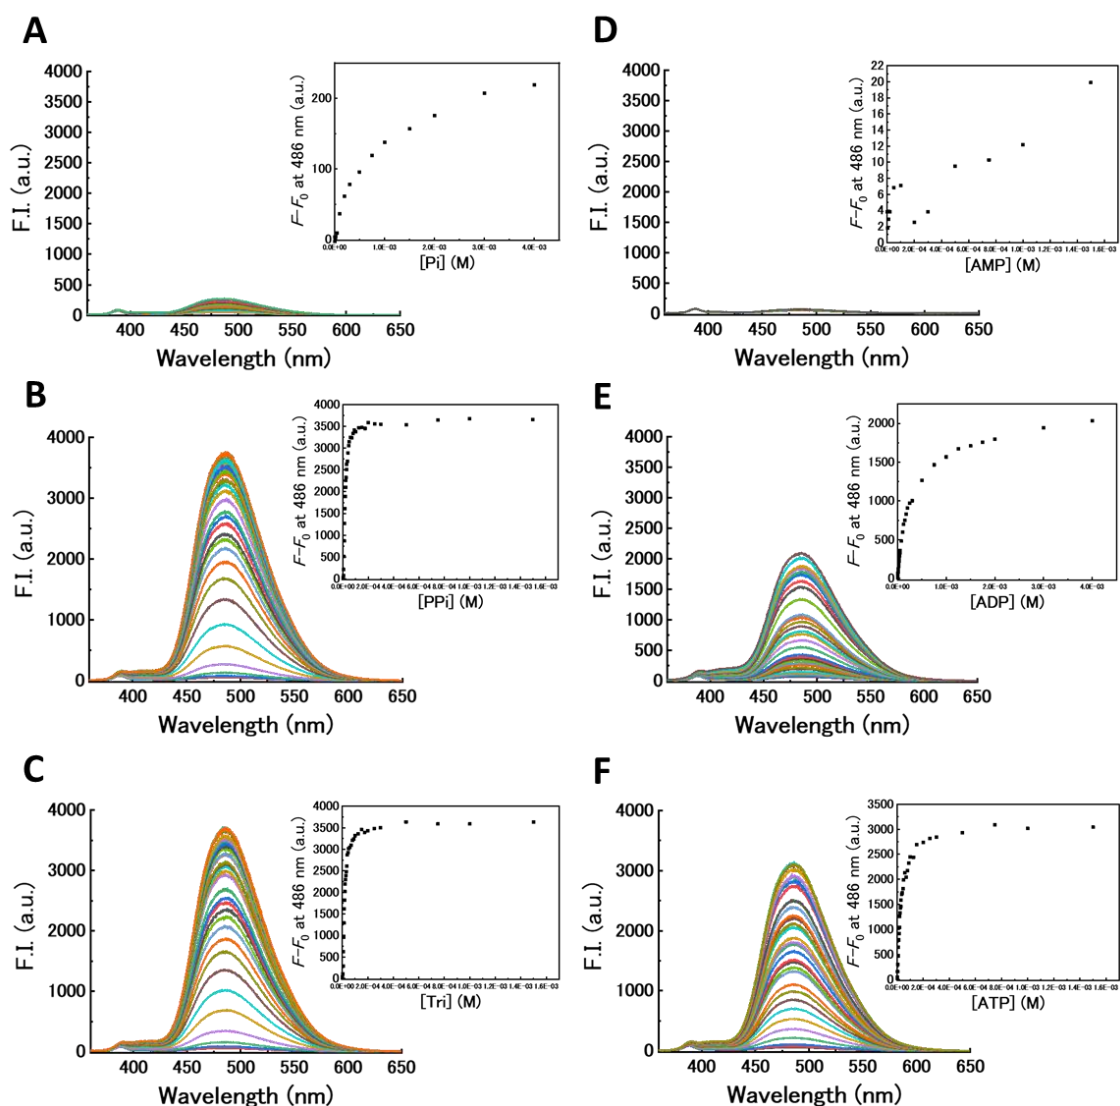

**Fig. S4** Fluorescence spectra and Fluorescence change at 486 nm of **Cu-dpa-QZ2** against (A) Pi, (B) PPI, (C) Tri, (D) AMP, (E) ADP and (F) ATP in 5% DMSO-95% water (v/v), pH7.4 adjusted by HEPES/NaOH buffer, at 25 °C ( $\lambda_{\text{ex}} = 345 \text{ nm}$ ). **[dpa-QZ2]** = 0.01 mM, **[Cu(NO<sub>3</sub>)<sub>2</sub>]** = 0.02 mM, **[phosphoric acid]** = 0 - 4 mM, **[HEPES buffer]** = 5.0 mM, **[NaNO<sub>3</sub>]** = 0.10 M.

**Fig. S5: Comparison Studies of Blue Shift under Hydrophobic Condition**

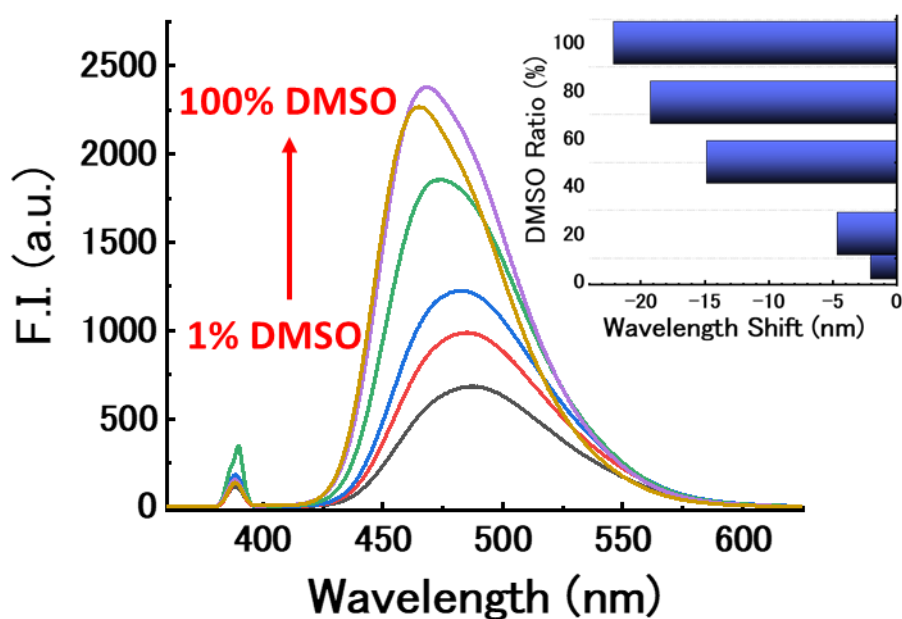

**Fig. S5** Fluorescence spectra of **dpa-QZ2** with DMSO concentration changes in 1% - 100% DMSO in 1% DMSO - 99% water (v/v), and their wavelength shifts, pH7.4 adjusted by HEPES/NaOH buffer, at 25 °C ( $\lambda_{\text{ex}} = 345 \text{ nm}$ ). [**dpa-QZ2**] = 10  $\mu\text{M}$ , [HEPES buffer] = 5.0 mM, [ $\text{NaNO}_3$ ] = 0.10 M.

**Fig. S6: Metal Ion Selectivity of dpa-QZ1 in the presence of CyDs**

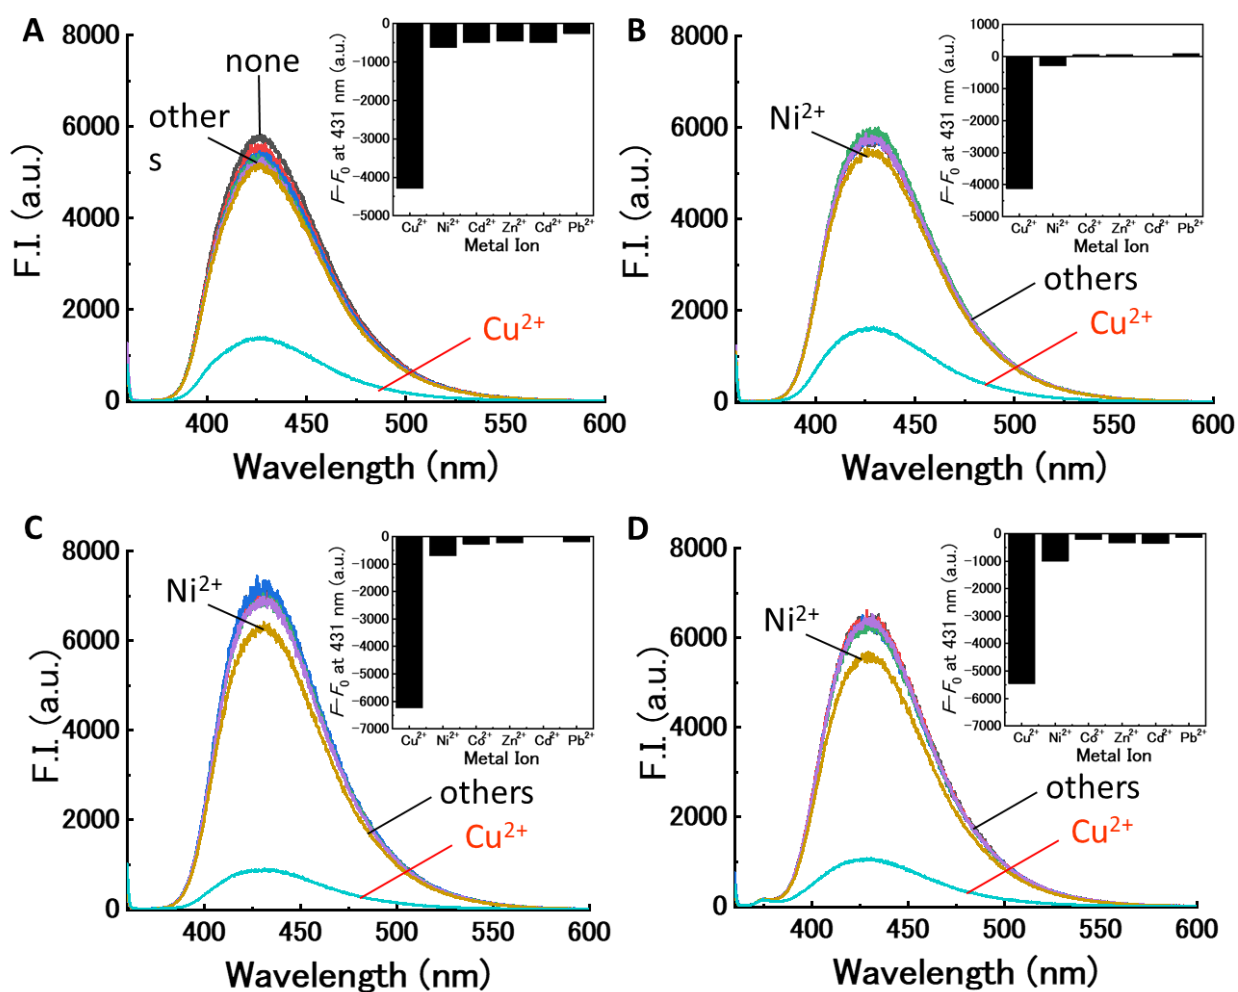

**Fig. S6** Fluorescence spectra of **dpa-QZ1** ( $\lambda_{\text{ex}} = 355 \text{ nm}$ ) with various metals in the presence of (A)  $\beta$ -CyD, (B)  $\gamma$ -CyD, (C) FPB- $\beta$ -CyD and (D) FPB- $\gamma$ -CyD in 1% DMSO – 99% water (v/v), pH7.4 adjusted by HEPES/NaOH buffer, at 25 °C.  $F-F_0$  is the fluorescence intensity difference at fluorescence maximum wavelength. [dpa-QZ1] = 10  $\mu\text{M}$ , [metal(NO<sub>3</sub>)<sub>2</sub>] = 20  $\mu\text{M}$ , [CyD] = 5.0 mM, [FPB-CyD] = 0.50 mM, [HEPES buffer] = 5.0 mM, [NaNO<sub>3</sub>] = 0.10 M.



**Fig. S7: Metal Ion Selectivity of dpa-QZ2 in the presence of CyDs**

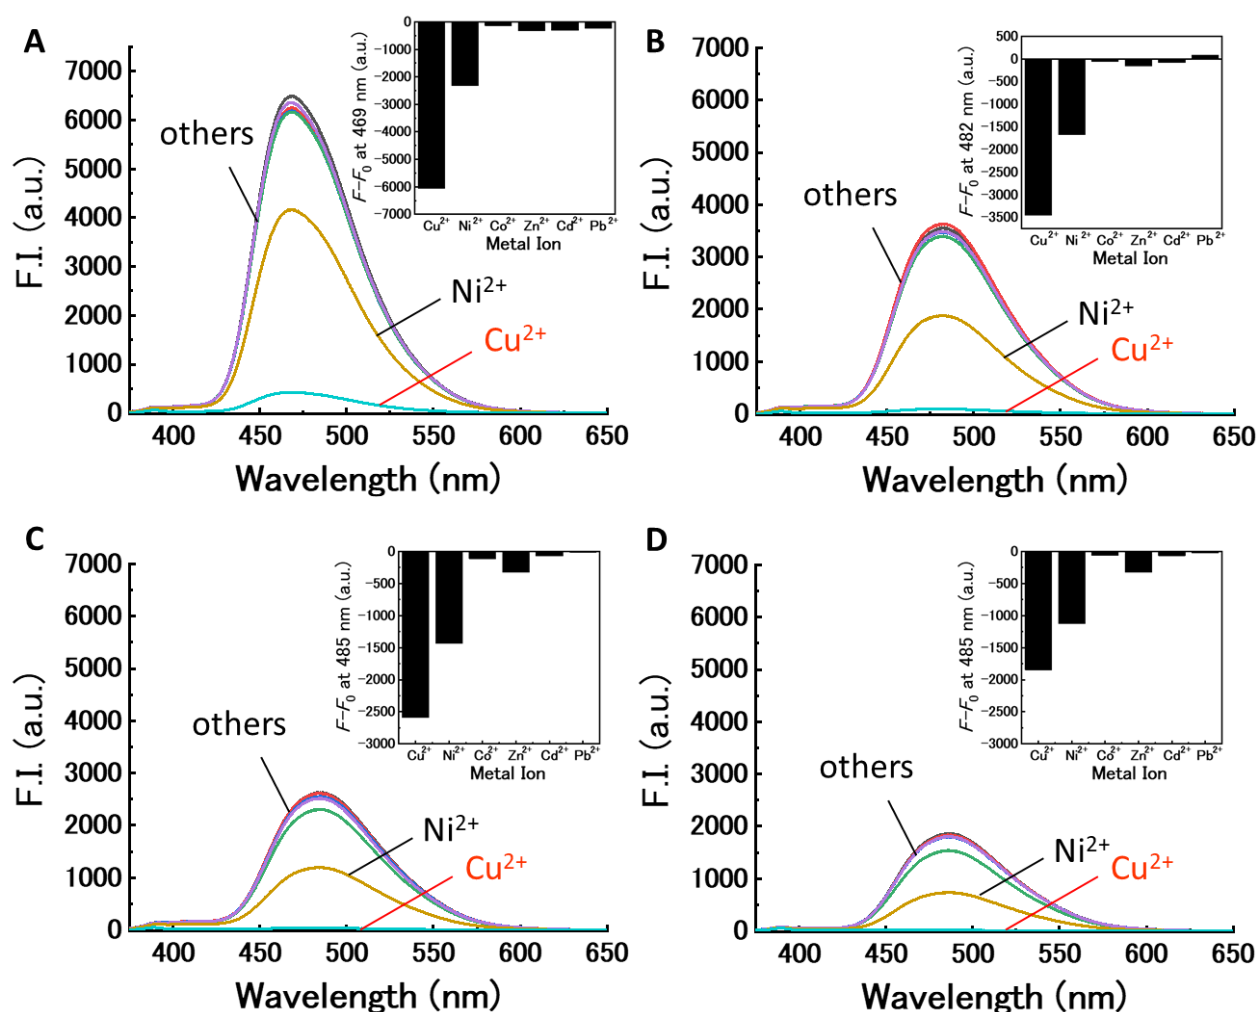

**Fig. S7** Fluorescence spectra of **dpa-QZ2** ( $\lambda_{\text{ex}} = 345 \text{ nm}$ ) with various metals in the presence of (A)  $\beta$ -CyD, (B)  $\gamma$ -CyD, (C) FPB- $\beta$ -CyD and (D) FPB- $\gamma$ -CyD in 1% DMSO – 99% water (v/v), pH7.4 adjusted by HEPES/NaOH buffer, at 25 °C.  $F-F_0$  is the fluorescence intensity difference at fluorescence maximum wavelength.  $[\text{dpa-QZ2}] = 10 \mu\text{M}$ ,  $[\text{metal}(\text{NO}_3)_2] = 20 \mu\text{M}$ ,  $[\text{CyD}] = 5.0 \text{ mM}$ ,  $[\text{FPB-CyD}] = 0.50 \text{ mM}$ ,  $[\text{HEPES buffer}] = 5.0 \text{ mM}$ ,  $[\text{NaNO}_3] = 0.10 \text{ M}$ .

**Fig. S8: Phosphoric Acids Recognition of Cu-dpa-QZ1 in the presence of CyDs**

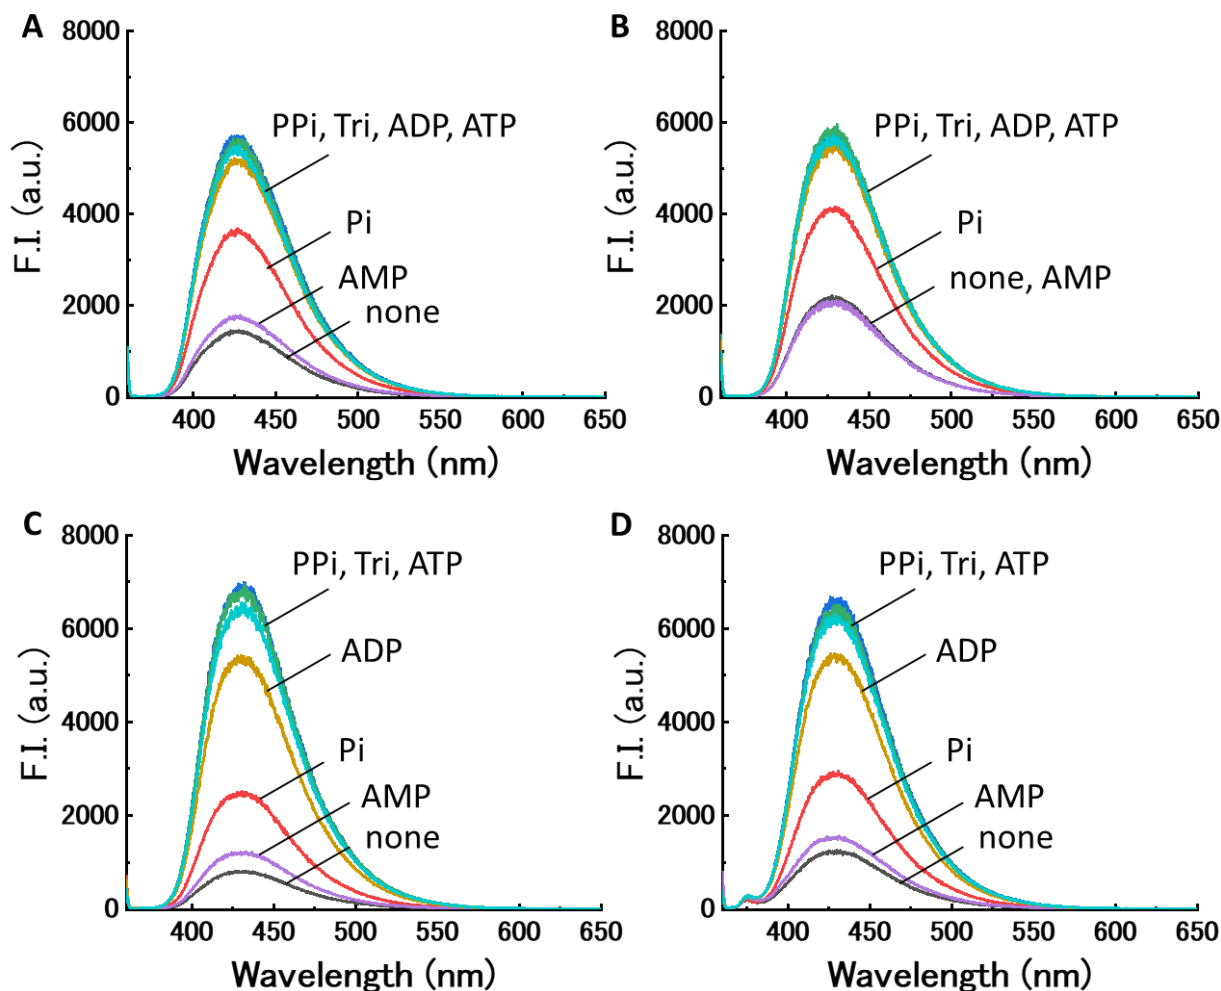

**Fig. S8** Fluorescence spectra of **Cu-dpa-QZ1** ( $\lambda_{\text{ex}} = 355 \text{ nm}$ ) with phosphoric acid derivatives (Pi, PPi, Tri, AMP, ADP and ATP) in the presence of (A)  $\beta$ -CyD, (B)  $\gamma$ -CyD, (C) FPB- $\beta$ -CyD, and (D) FPB- $\gamma$ -CyD in 1% DMSO – 99% water (v/v), pH7.4 adjusted by HEPES/NaOH buffer, at 25 °C.  $F-F_0$  is the fluorescence intensity difference at fluorescence maximum wavelength.  $[\text{dpa-QZ1}] = 10 \mu\text{M}$ ,  $[\text{Cu}(\text{NO}_3)_2] = 20 \mu\text{M}$ ,  $[\text{CyD}] = 5.0 \text{ mM}$ ,  $[\text{FPB-CyD}] = 0.50 \text{ mM}$ ,  $[\text{phosphoric acid}] = 1.0 \text{ mM}$ ,  $[\text{HEPES buffer}] = 5.0 \text{ mM}$ ,  $[\text{NaNO}_3] = 0.10 \text{ M}$ .

**Fig. S9: Phosphoric Acids Recognition of Cu-dpa-QZ2 in the presence of CyDs**

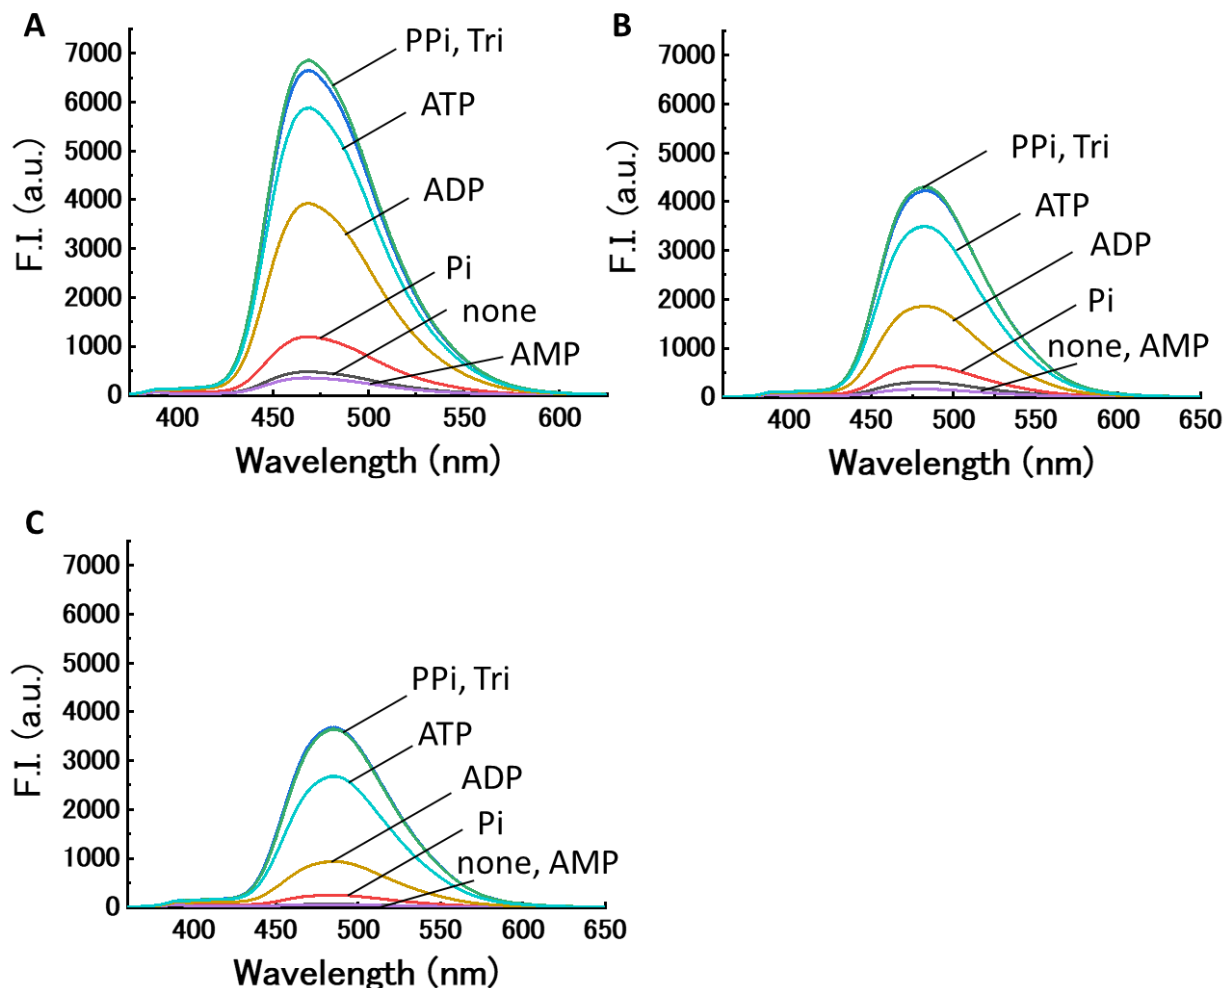

**Fig. S9** Fluorescence spectra of **Cu-dpa-QZ2** ( $\lambda_{\text{ex}} = 345 \text{ nm}$ ) with phosphoric acid derivatives (Pi, PPI, Tri, AMP, ADP and ATP) in the presence of (A)  $\beta$ -CyD, (B)  $\gamma$ -CyD, and (C) FPB- $\beta$ -CyD in 1% DMSO – 99% water (v/v), pH7.4 adjusted by HEPES/NaOH buffer, at 25 °C.  $F - F_0$  is the fluorescence intensity difference at fluorescence maximum wavelength.  $[\text{dpa-QZ2}] = 10 \mu\text{M}$ ,  $[\text{Cu}(\text{NO}_3)_2] = 20 \mu\text{M}$ ,  $[\text{CyD}] = 5.0 \text{ mM}$ ,  $[\text{FPB-CyD}] = 0.50 \text{ mM}$ ,  $[\text{phosphoric acid}] = 1.0 \text{ mM}$ ,  $[\text{HEPES buffer}] = 5.0 \text{ mM}$ ,  $[\text{NaNO}_3] = 0.10 \text{ M}$ .

**Fig. S10: Phosphoric Acids Recognition of Cu-dpa-QZ2 in the presence of CyDs**

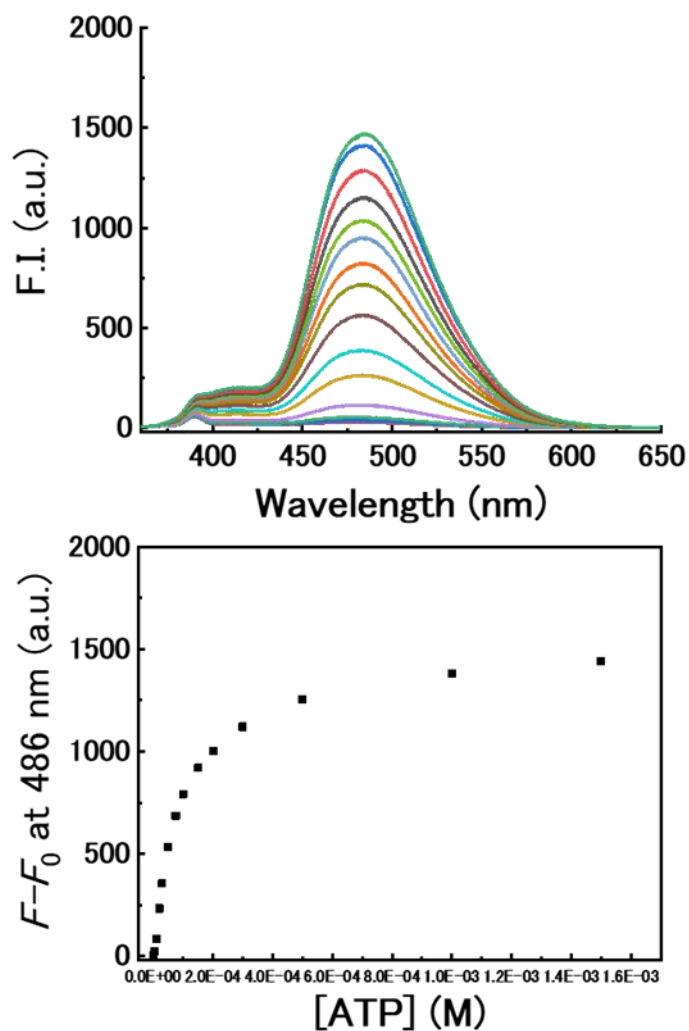

**Fig. S10** Fluorescence spectra and Fluorescence change at 486 nm of **Cu-dpa-QZ2/FPB- $\gamma$ -CyD** against ATP in 1% DMSO-99% water (v/v), pH7.4 adjusted by HEPES/NaOH buffer, at 25 °C ( $\lambda_{\text{ex}} = 345$  nm). [dpa-QZ2] = 0.01 mM, [FPB- $\gamma$ -CyD] = 0.50 mM, [Cu(NO<sub>3</sub>)<sub>2</sub>] = 0.02 mM, [phosphoric acid] = 0 – 1.5 mM, [HEPES buffer] = 5.0 mM, [NaNO<sub>3</sub>] = 0.10 M.

**Fig. S11:** Fluorescence response of dpa-QZ2 to FPB- $\gamma$ -CyD

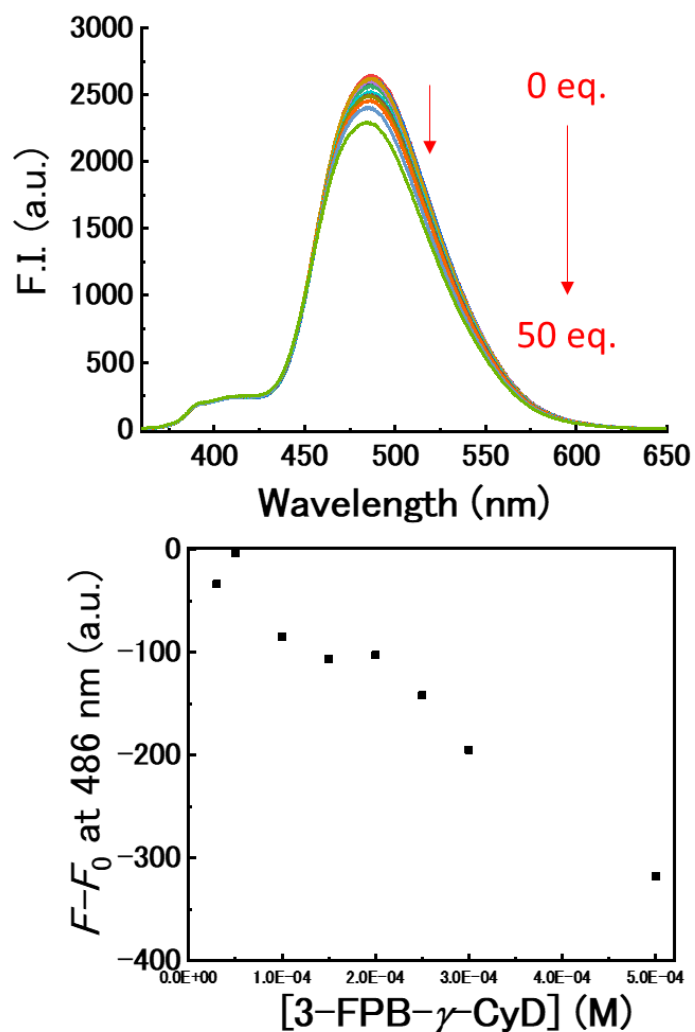

**Fig. S11** Fluorescence response of **dpa-QZ2** to FPB- $\gamma$ -CyD (0 – 0.5 mM) in 1% DMSO - 99% water (v/v), and their wavelength shifts, pH7.4 adjusted by HEPES/NaOH buffer, at 25 °C ( $\lambda_{\text{ex}} = 345$  nm). [dpa-QZ2] = 10  $\mu$ M, [HEPES buffer] = 5.0 mM, [NaNO<sub>3</sub>] = 0.10 M.

## Calculation of the Binding Constants

The apparent 1:1 binding constants ( $K_{app}$ ) of host molecules with guest molecules (i.e. **dpa-QZ** with metal ions and **Cu-dpa-QZ** with phosphoric acids) were determined from the changes in the fluorescence spectra. With an increase in concentration of guest molecules, the fluorescence intensity was also changed (Fig. S3-S5). On the assumption that the fluorescence change is only induced by the formation of a 1:1 complex (HG) between host molecules (H) and guest molecules (G), the binding constant  $K_{app}$  can be defined as follows:

<Symbols used>

$[H]_t$ : total concentration of host molecules

$[G]_t$ : total concentration of guest molecules

$F$ : fluorescent intensity     $\phi$ : fluorescence quantum yield     $\beta$ : device constant

<Theoretical formulas for curve fitting method>

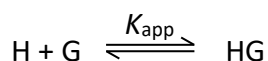

$$K_{app} = \frac{[HG]}{[H][G]} \quad \dots(1)$$

$$[H]_t = [H] + [HG] \quad \dots(2)$$

$$[G]_t = [G] + [HG] \quad \dots(3)$$

From equations (1), (2) and (3)

$$[G] = \frac{- (1 + K_{app}([H]_t - [G]_t)) + \sqrt{(1 + K_{app}([H]_t - [G]_t))^2 + 4K_{app}[G]_t}}{2K_{app}} \quad \dots(4)$$

In the case that the concentration of a fluorescence chemical species A is very low, the fluorescence intensity  $F$  can be expressed as follows,

$$F = \beta\phi[A] \quad \dots(5)$$

Therefore, the fluorescence intensity difference can be expressed as:

$$F_{HG} - F_0 = (\beta\phi_H[H] + \beta\phi_{HG}[HG]) - \beta\phi_H[H] \quad \dots(6)$$

From equations (6), the fluorescence intensity difference can be expressed as a function of [G] and [H]<sub>t</sub>, using equations (1), (3) and (4),

$$F_{HG} - F_0 = \frac{[G_t] \left( -1 - K_{app}([G_t] - [H_t]) + \sqrt{(1 + K_{app}([G_t] - [H_t]))^2 + 4K_{app}[H_t]} \right) \left( \frac{F_{HG}}{[HG]} - \frac{F_0}{[G_t]} \right)}{1 - K_{app}([G_t] - [H_t]) + \sqrt{(1 + K_{app}([G_t] - [H_t]))^2 + 4K_{app}[H_t]}} \quad \dots(7)$$

Therefore, from the equation (7), the apparent binding constant for the 1:1 inclusion complex was calculated by the least-square curve fitting analysis (KaleidaGraph<sup>R</sup> 4.0 software).

# NMR Spectra

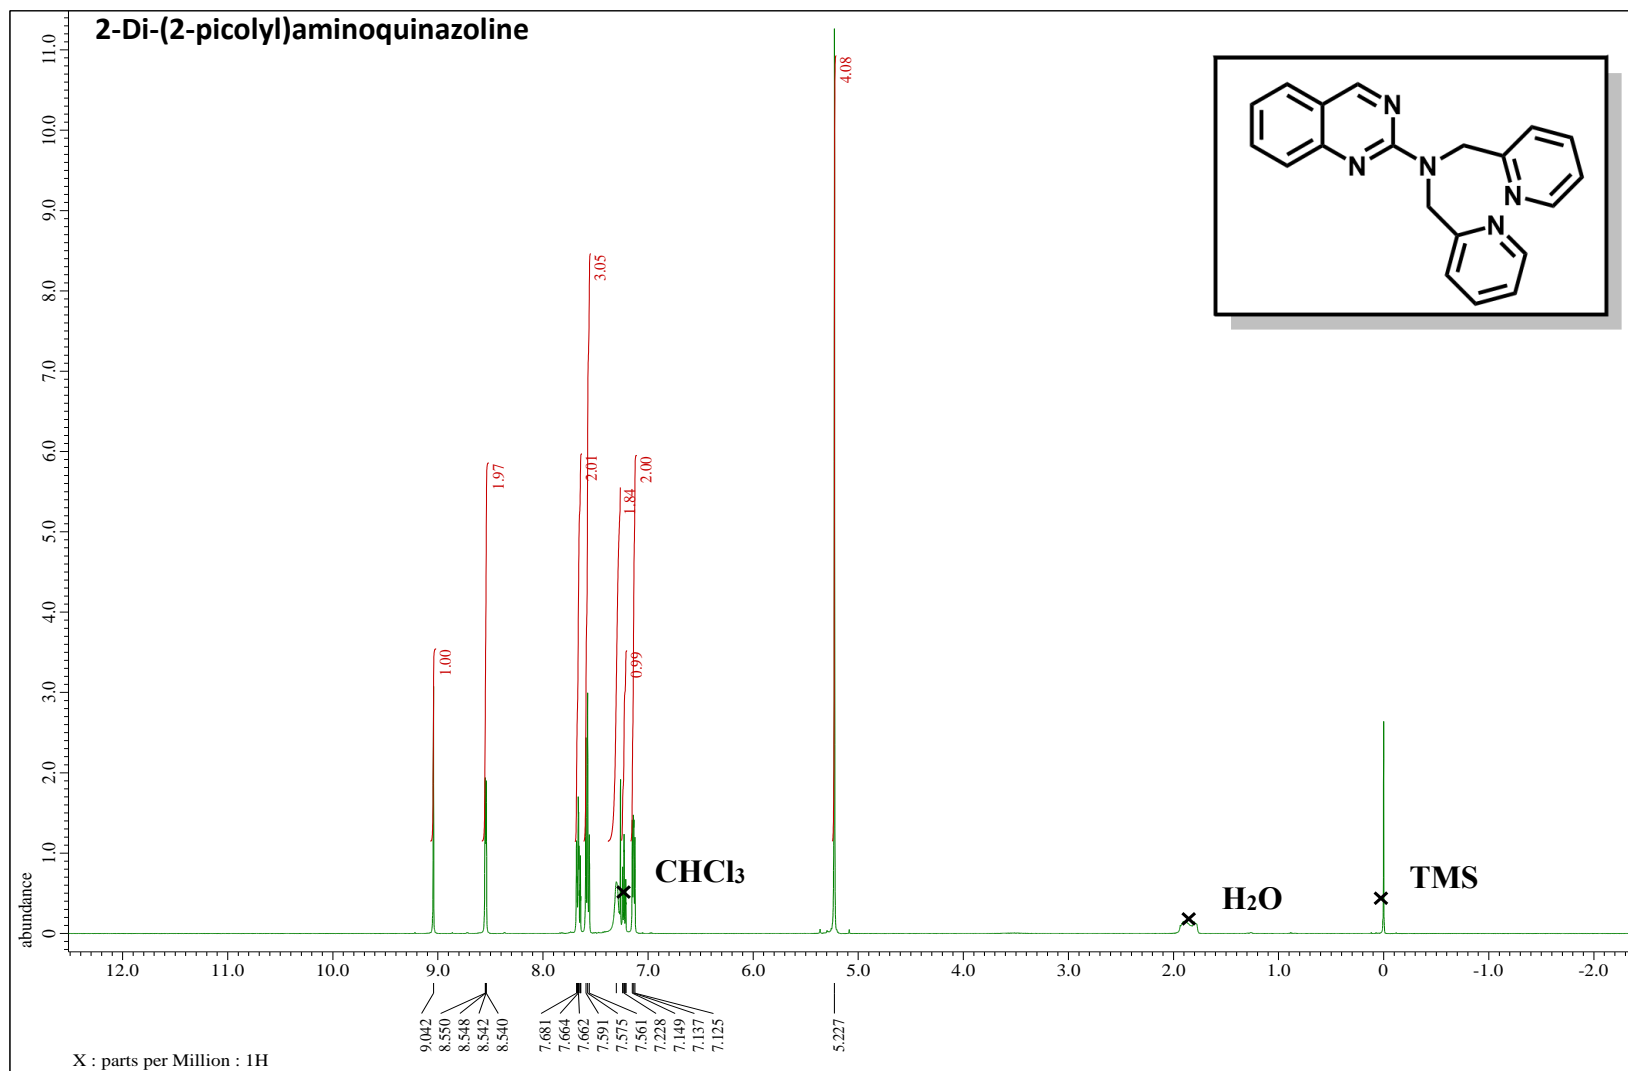



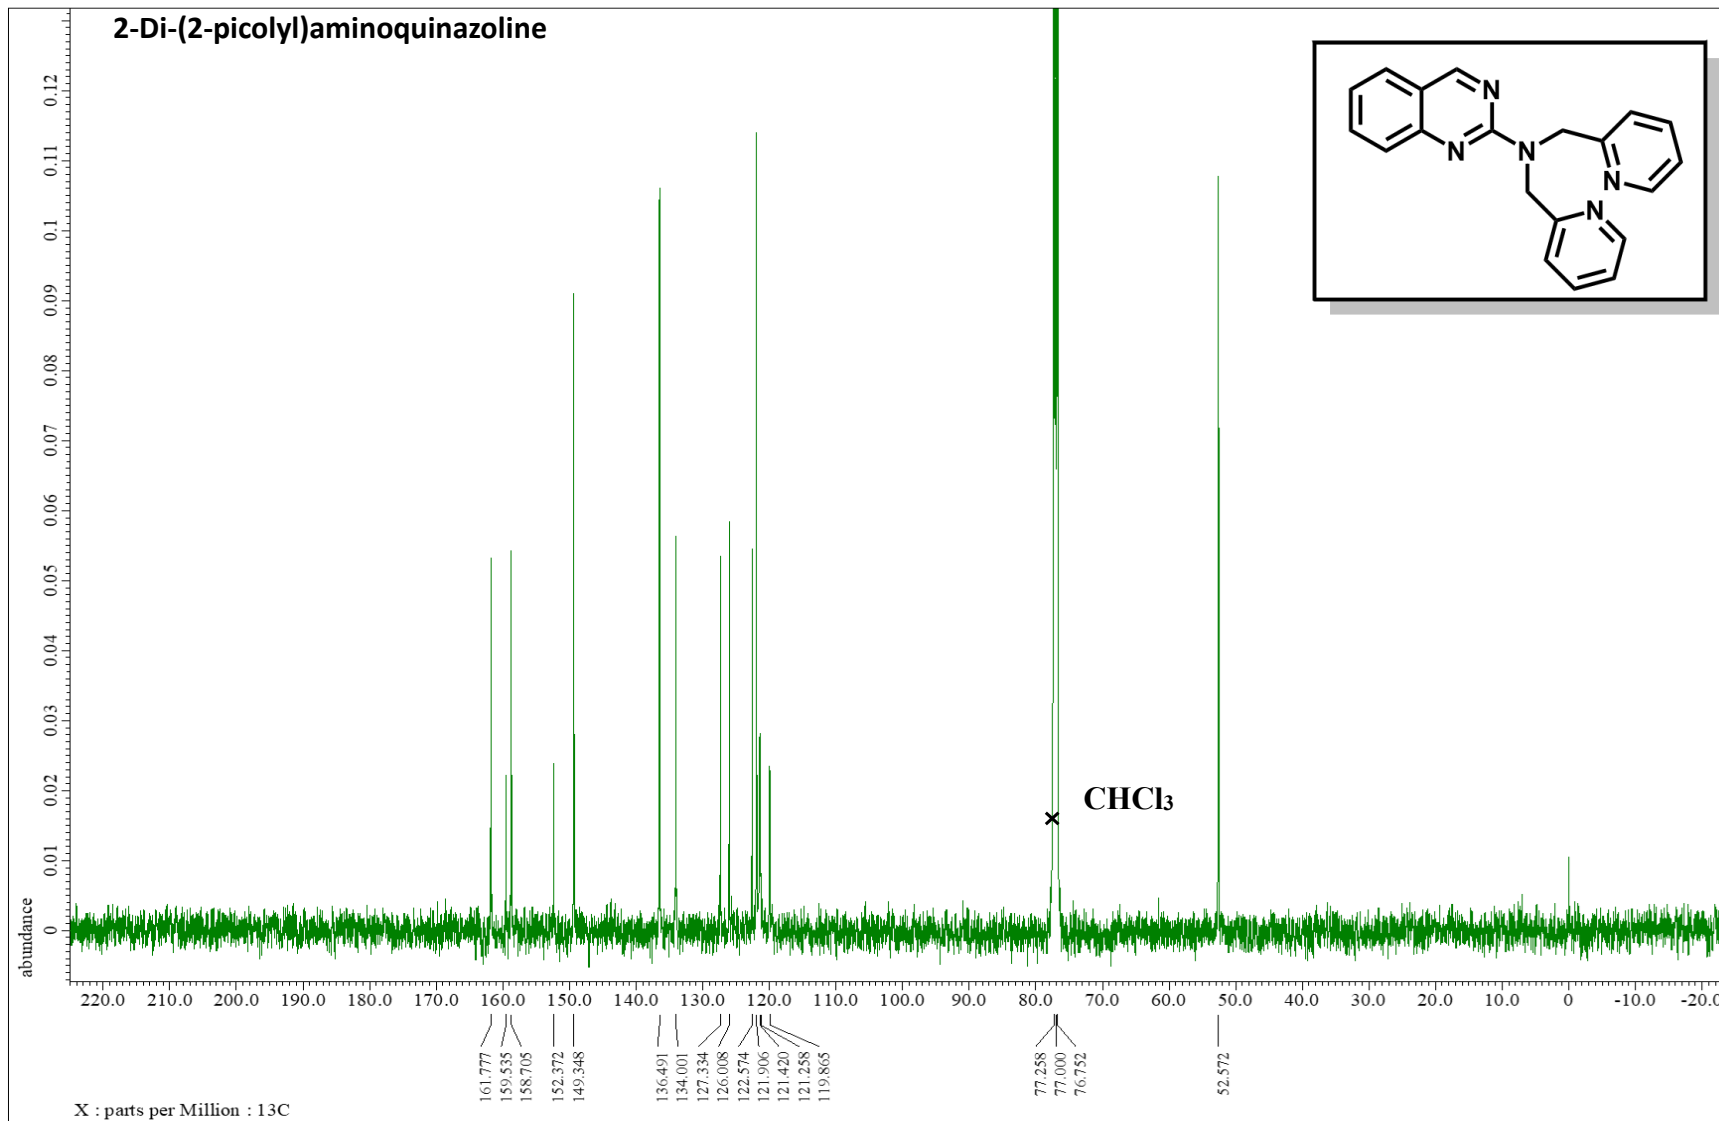

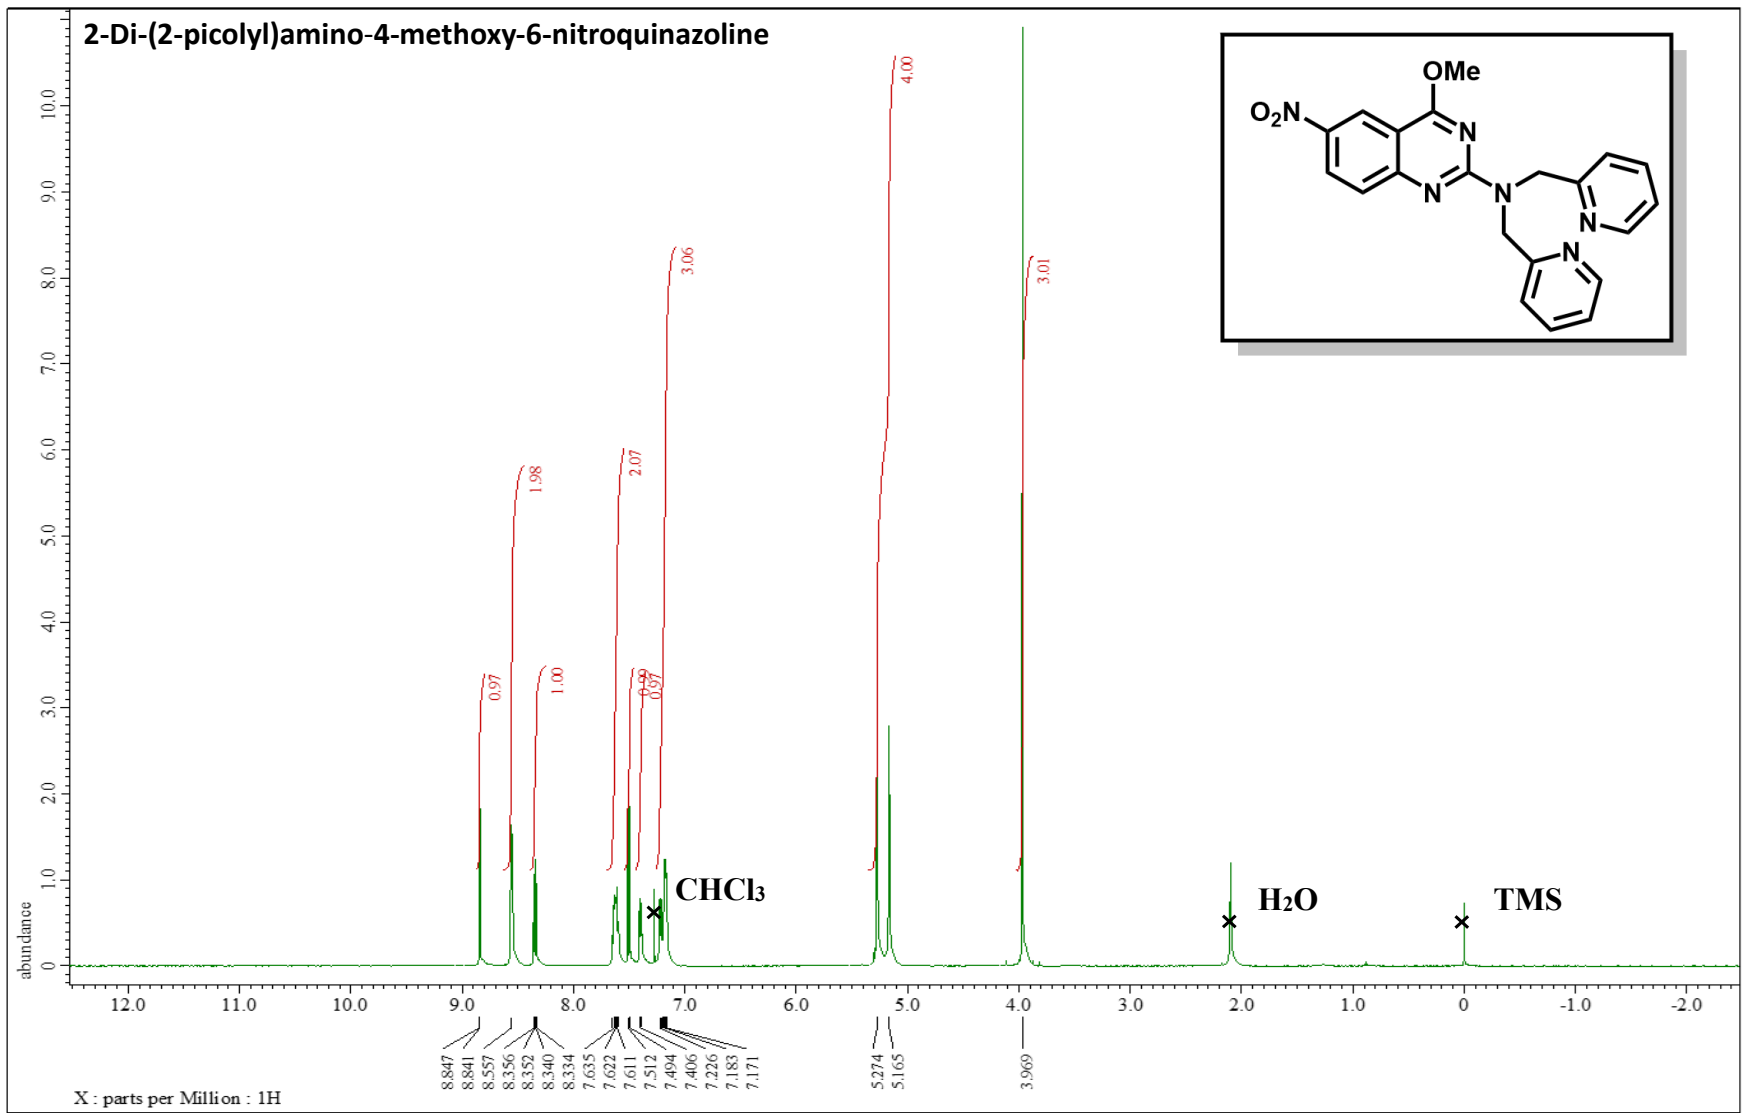

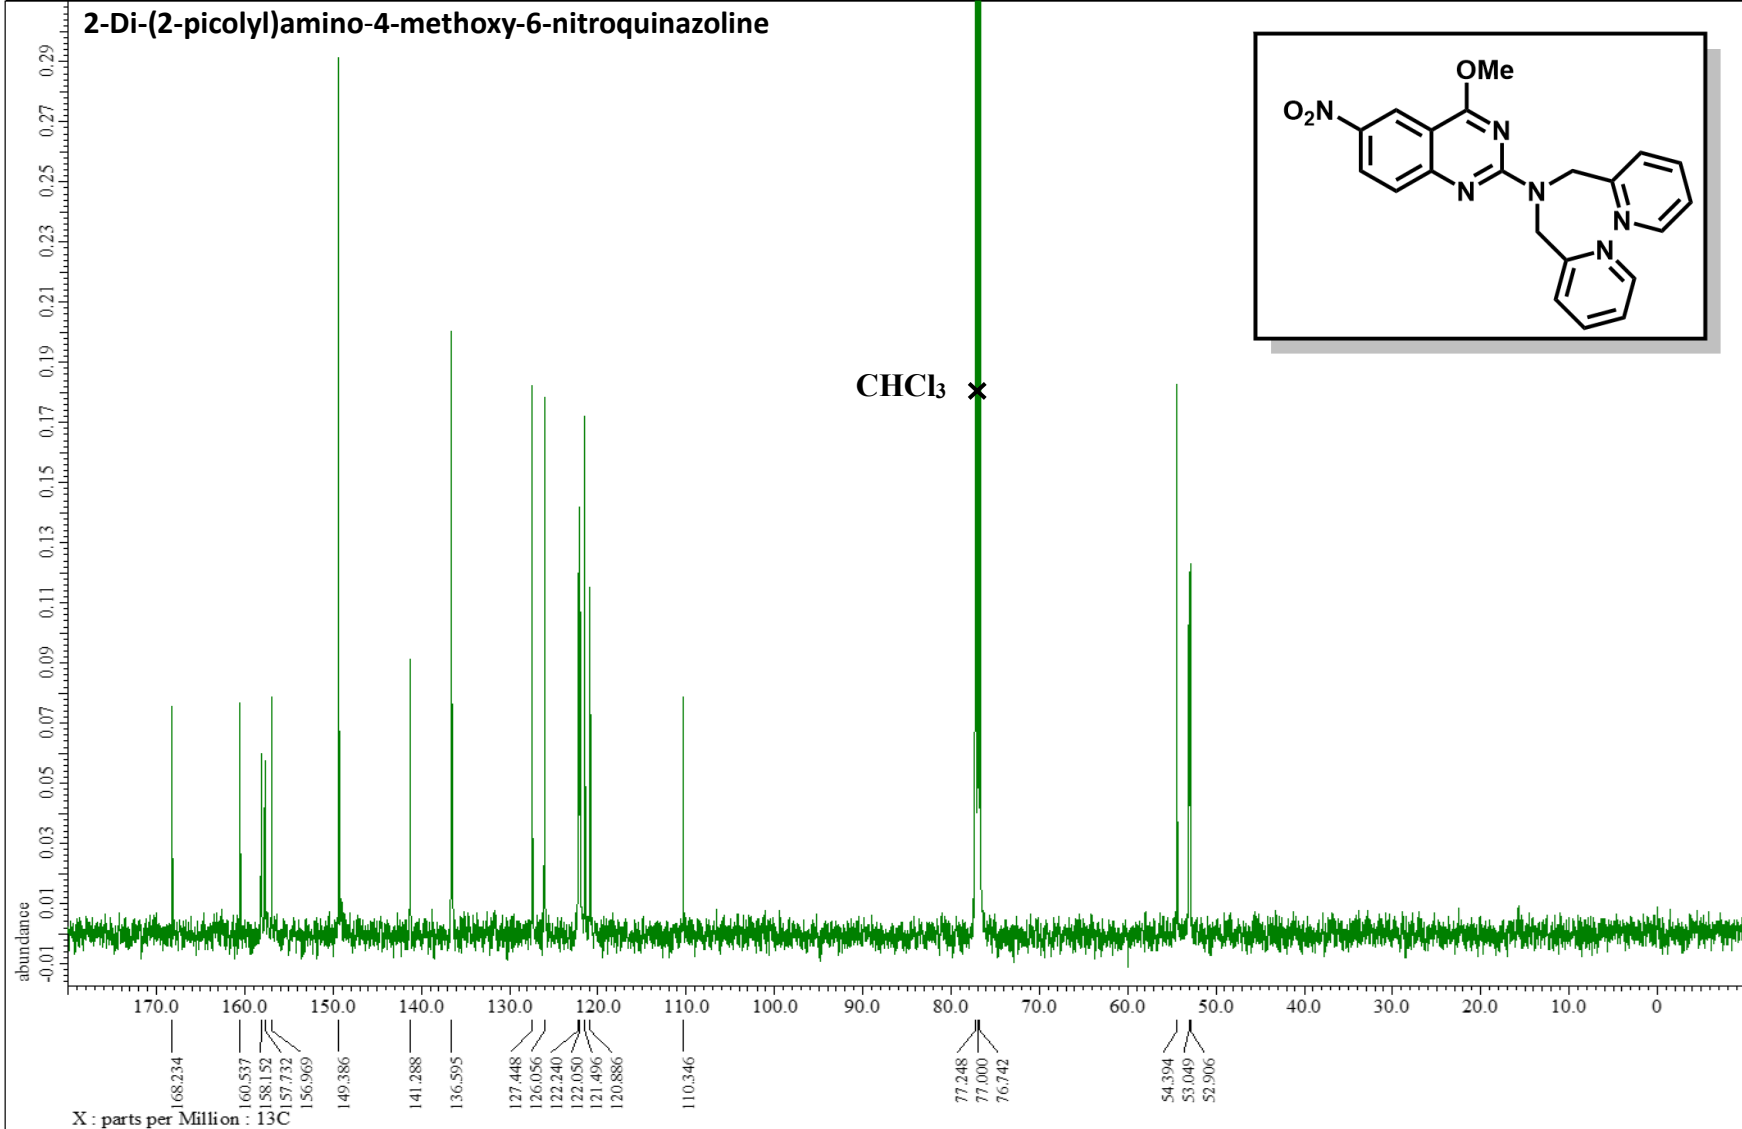

# 6-Dimethylamino-2-di-(2-picolyl)amino-4-methoxy-quinazoline

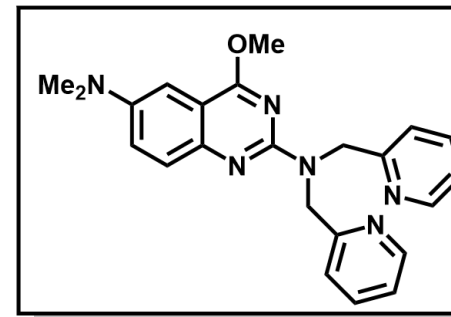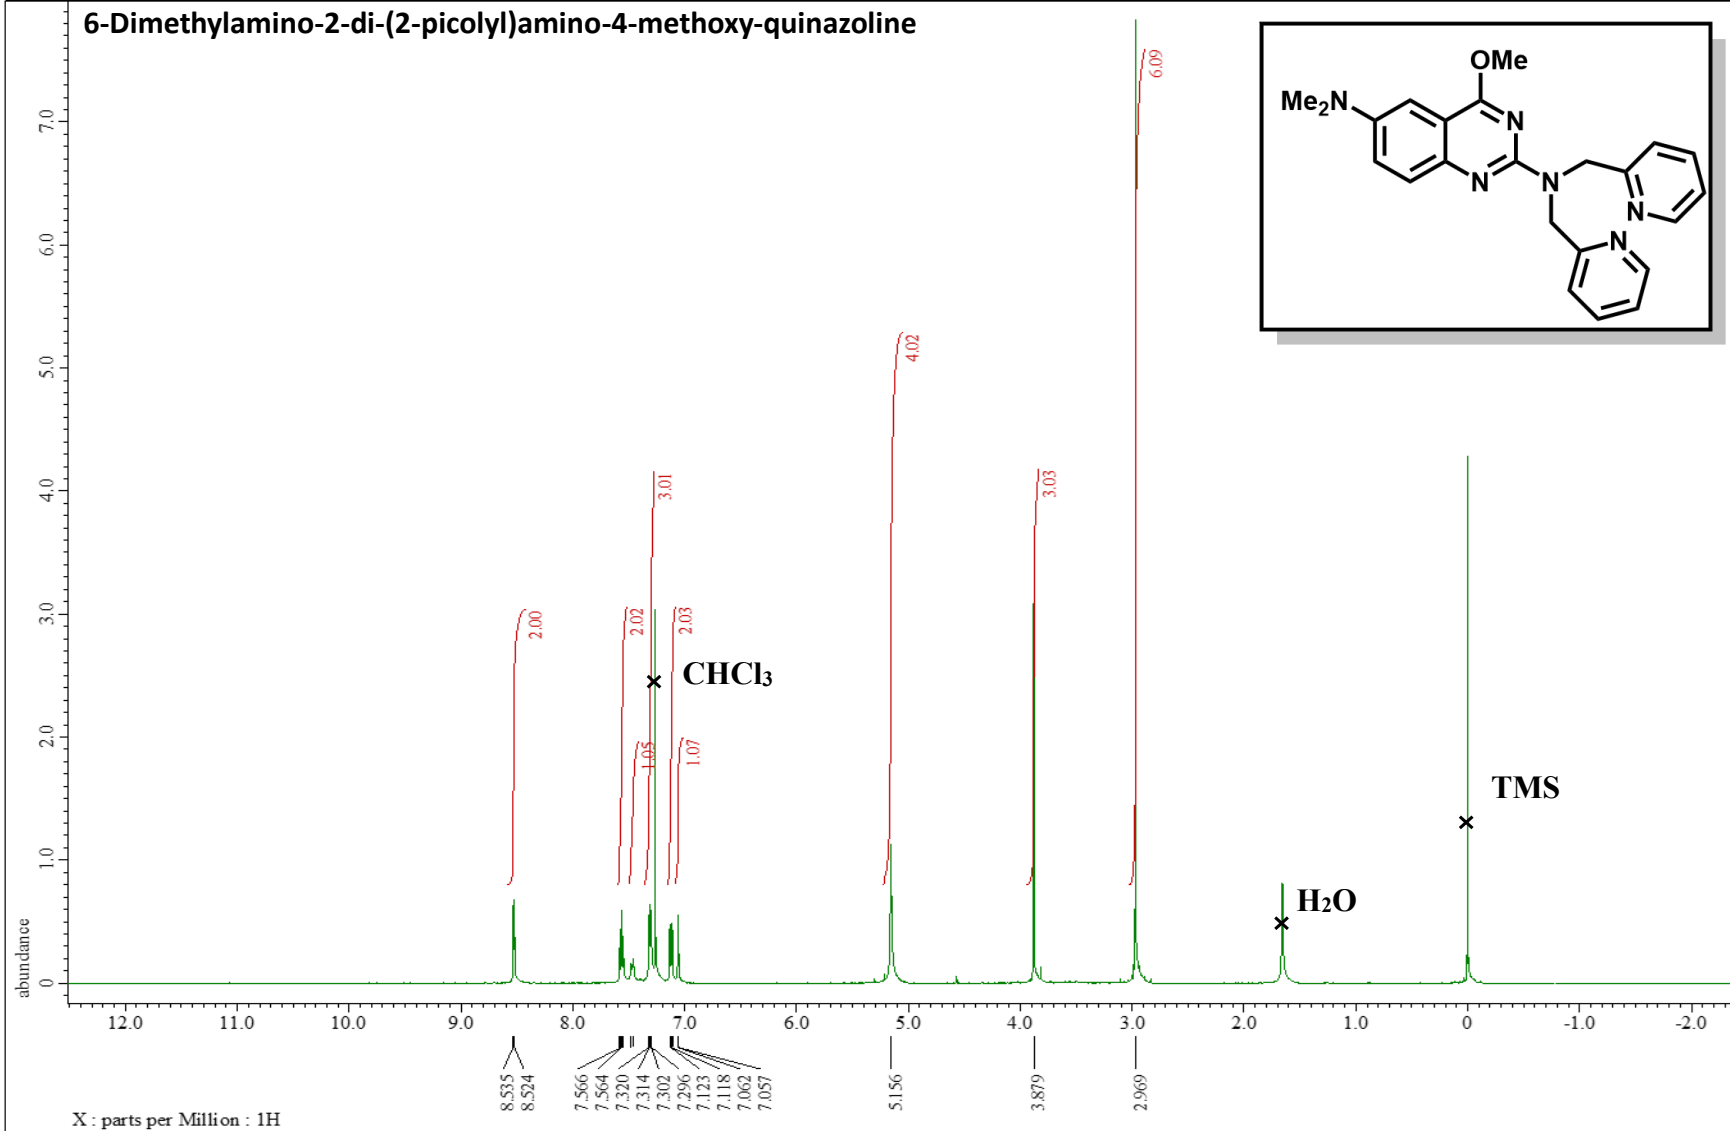

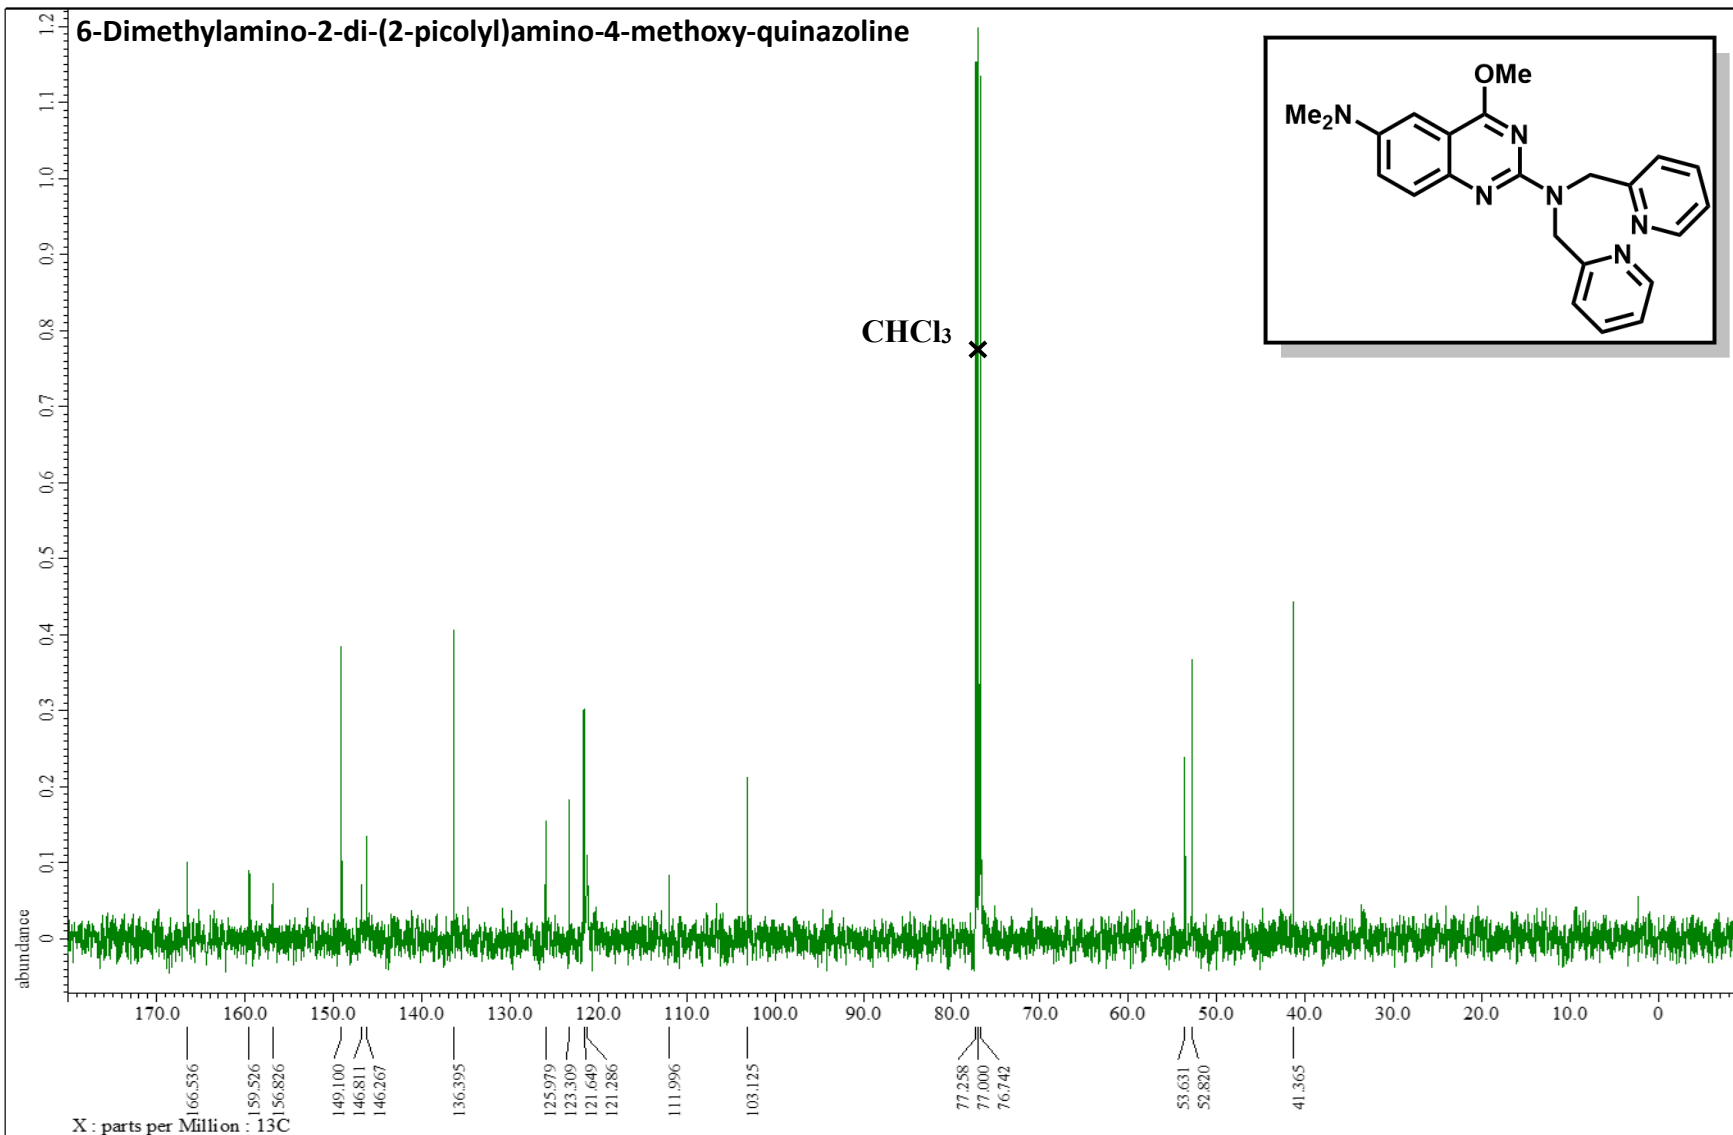

### FPB- $\gamma$ -CyD

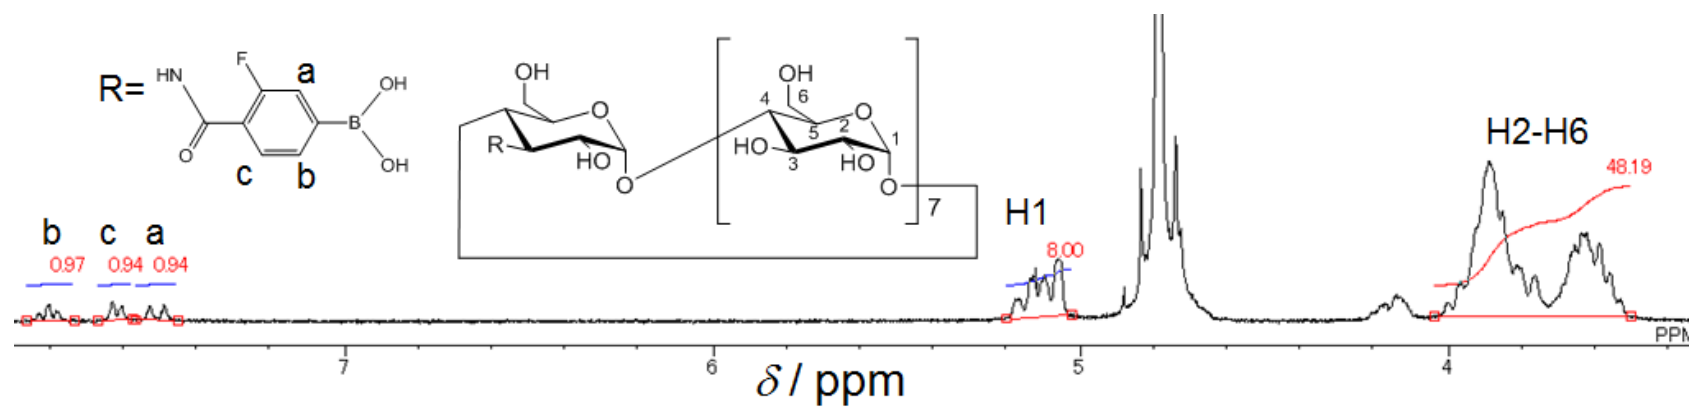

### FPB- $\beta$ -CyD

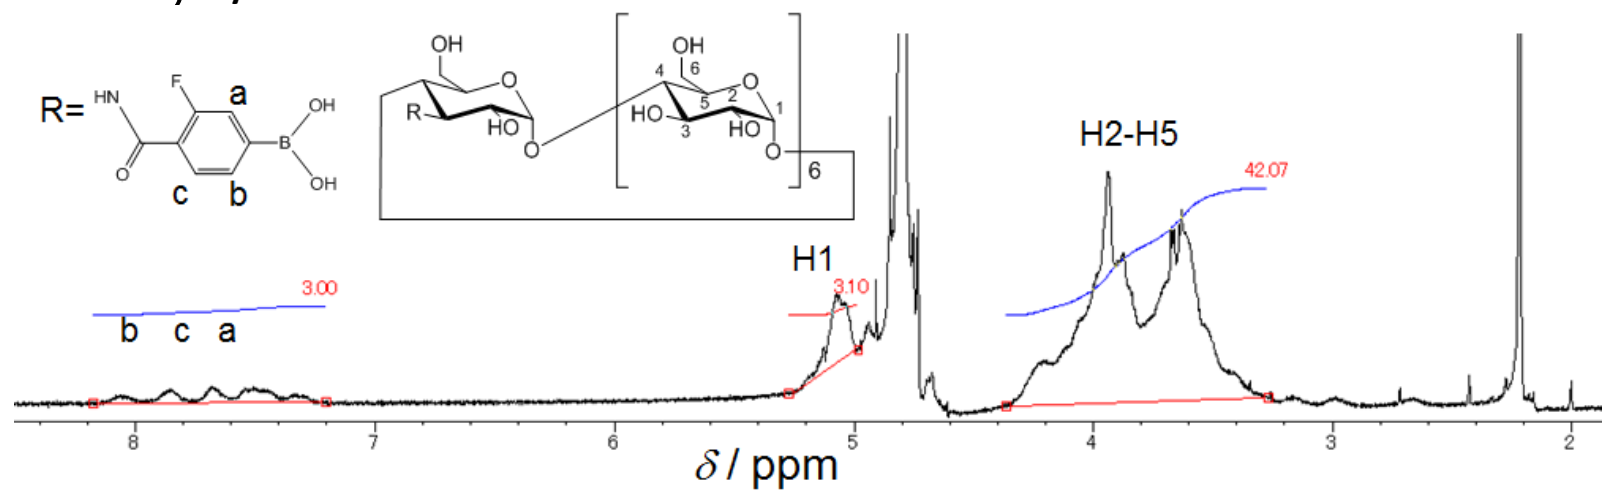

Supplement: d0ra01455a1.pdf [file d0ra01455a1.pdf]
